# Supplementary material
Source: PubMed Central journal article supplement (PMC4207718)
Supplement: supp_kwu208_kwu208supp.pdf [file supp_kwu208_kwu208supp.pdf]

## **WEB MATERIAL**

### **Maternal Intake of Supplemental Iron and Risk of Autism Spectrum Disorders**

Rebecca J. Schmidt\*, Daniel J. Tancredi, Paula Krakowiak, Robin L. Hansen, and Sally Ozonoff

\*Correspondence to Dr. Rebecca J. Schmidt, Department of Public Health Sciences, School of Medicine, University of California, Davis, 123 MS1C, 1 Shields Avenue, Davis, CA 95616-8638 (e-mail: rjschmidt@ucdavis.edu).

Abbreviations: ASD, autism spectrum disorder; CHARGE, Childhood Autism Risks from Genetics and Environment; CI, confidence interval; OR, odds ratio; TD, typical development.

**Web Table 1.** Adjusted Odds Ratios (OR) and 95% Confidence Intervals (CI) for Associations Between Taking an Iron-Specific Supplement and Child’s Risk of ASD in the CHARGE Study, California, United States, 2003–2009

| Time Period   | Month | OR <sup>a</sup> (95% CI) | <i>P</i> Value | OR <sup>b</sup> (95% CI) | <i>P</i> Value |
|---------------|-------|--------------------------|----------------|--------------------------|----------------|
| Pregpregnancy | –3    | 0.98 (0.32, 3.02)        | 0.97           | 0.89 (0.19, 4.13)        | 0.88           |
|               | –2    | 0.98 (0.32, 3.02)        | 0.97           | 0.89 (0.19, 4.13)        | 0.88           |
|               | –1    | 0.88 (0.32, 2.46)        | 0.81           | 0.78 (0.21, 2.84)        | 0.70           |
| Pregnancy     | 1     | 0.71 (0.36, 1.40)        | 0.32           | 0.67 (0.29, 1.55)        | 0.35           |
|               | 2     | 0.75 (0.43, 1.30)        | 0.30           | 0.72 (0.37, 1.39)        | 0.33           |
|               | 3     | 0.74 (0.45, 1.20)        | 0.22           | 0.71 (0.40, 1.27)        | 0.25           |
|               | 4     | 0.64 (0.41, 0.98)        | 0.04           | 0.64 (0.39, 1.04)        | 0.07           |
|               | 5     | 0.67 (0.44, 1.01)        | 0.06           | 0.65 (0.41, 1.04)        | 0.07           |
|               | 6     | 0.67 (0.45, 0.99)        | 0.04           | 0.66 (0.43, 1.02)        | 0.06           |
|               | 7     | 0.76 (0.52, 1.12)        | 0.16           | 0.73 (0.48, 1.13)        | 0.16           |
|               | 8     | 0.79 (0.53, 1.17)        | 0.24           | 0.77 (0.49, 1.20)        | 0.24           |
|               | 9     | 0.68 (0.45, 1.04)        | 0.08           | 0.64 (0.39, 1.03)        | 0.06           |
| Breastfeeding | BF    | 0.57 (0.34, 0.95)        | 0.03           | 0.51 (0.28, 0.93)        | 0.03           |

<sup>a</sup> Adjusted for child’s birth year and home ownership.

<sup>b</sup> Adjusted for folic acid intake during the first month (<600 µg/day, ≥600 µg/day), child’s birth year, and home ownership.

**Web Table 2.** Frequency of Cases and Controls with Information on Maternal Iron Supplement Intake During the Index Period and Confounders By Child’s Year of Birth

| Took Iron | 1998 |    | 1999 |    | 2000 |    | 2001 |    | 2002 |    | 2003 |    | 2004 |    | 2005 |    | 2006 |    | 2007 |    | 2008 |    |
|-----------|------|----|------|----|------|----|------|----|------|----|------|----|------|----|------|----|------|----|------|----|------|----|
|           | ASD  | TD |
| No        | 6    | 0  | 24   | 1  | 49   | 7  | 60   | 23 | 54   | 31 | 33   | 41 | 36   | 31 | 36   | 24 | 20   | 19 | 7    | 16 | 0    | 2  |
| Yes       | 1    | 0  | 5    | 1  | 21   | 11 | 23   | 10 | 12   | 19 | 9    | 18 | 13   | 13 | 14   | 4  | 3    | 5  | 2    | 4  | 0    | 0  |

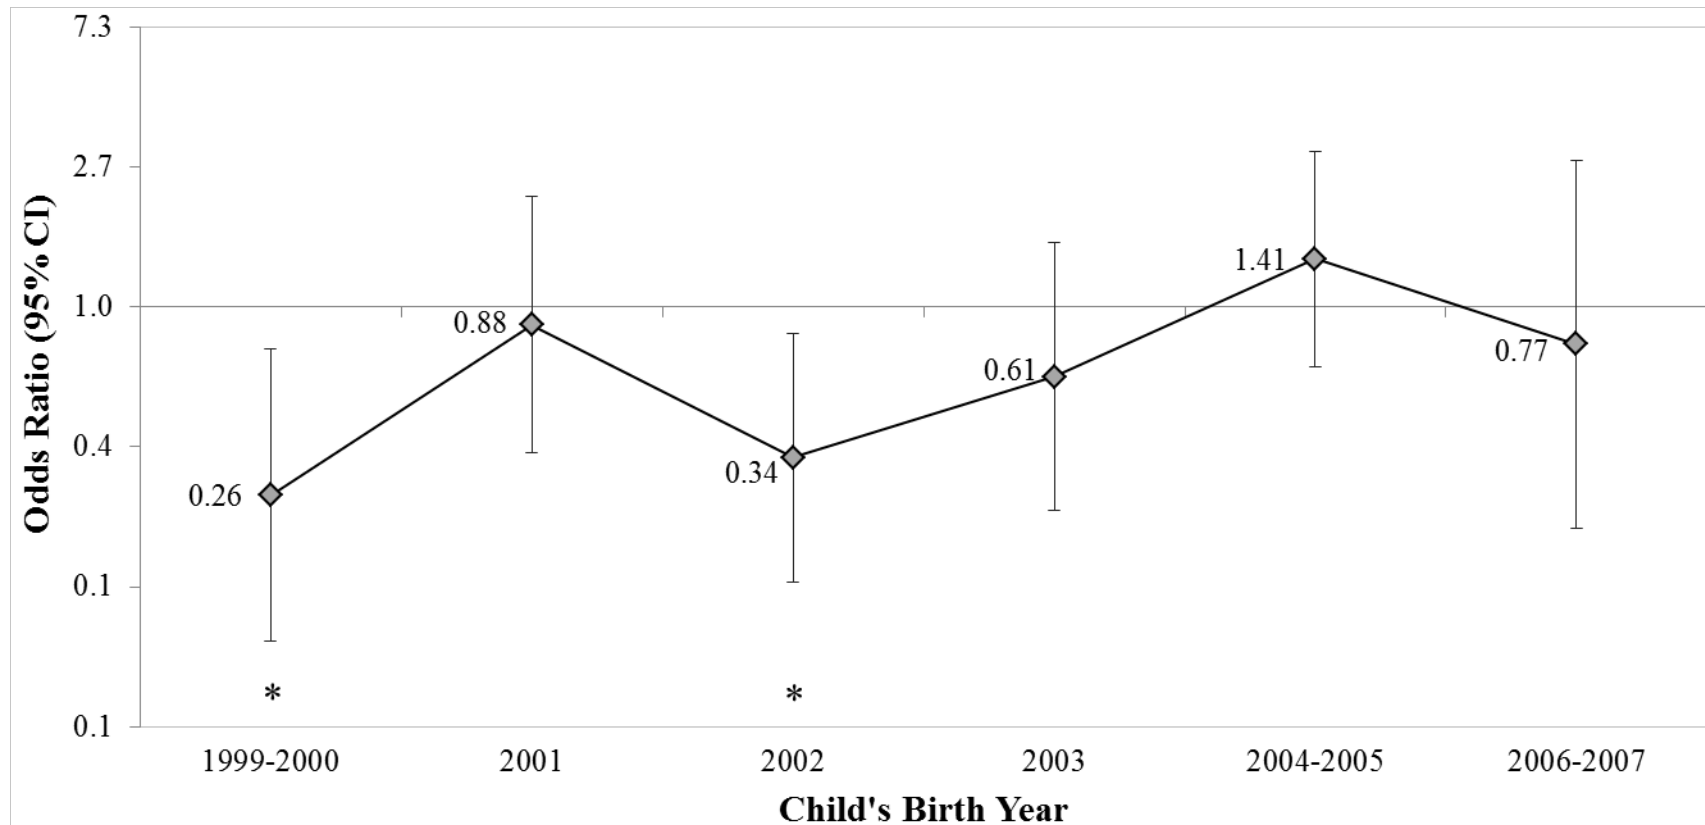

**Web Figure 1.** Adjusted odds ratios (95% CI) for the association between maternal iron supplement intake during the index period and autism spectrum disorder stratified by the child's year of birth in the CHARGE Study, California, United States, 2003–2009. Years having cells containing less than 5 individuals were combined. Odds ratios were adjusted for maternal folic acid intake during the first month of pregnancy, child's year of birth, and home ownership. *P* values for multiplicative interaction between child's birth year and iron supplement intake were: 0.47, 0.13, 0.42, 0.02, and 0.44, for years 1999–2000, 2001, 2003, 2004–2005, and 2006–2007, respectively (2002 was the reference year). Significant associations with ASD are signified by an asterisk (\*) at *P* < 0.05 and by a plus sign (+) at *P* < 0.10.

**Web Table 3.** Adjusted Odds Ratios (OR) and 95% Confidence Intervals (CI) for Associations Between Quintiles of Mean Maternal Iron Intake and Child’s Risk of ASD in the CHARGE Study, California, United States, 2003–2009

| Time Period   | Month | Quintile 2        |          | Quintile 3        |          | Quintile 4        |          | Quintile 5        |          |
|---------------|-------|-------------------|----------|-------------------|----------|-------------------|----------|-------------------|----------|
|               |       | OR (95% CI)       | <i>P</i> |
| Prepregnancy  | –3    | 1.13 (0.69, 1.87) | 0.62     | 1.02 (0.62, 1.69) | 0.93     | 1.11 (0.66, 1.88) | 0.69     | 1.13 (0.65, 1.98) | 0.67     |
|               | –2    | 1.07 (0.65, 1.75) | 0.79     | 0.92 (0.56, 1.52) | 0.75     | 1.21 (0.72, 2.05) | 0.47     | 1.24 (0.70, 2.19) | 0.46     |
|               | –1    | 0.92 (0.57, 1.51) | 0.75     | 0.98 (0.59, 1.61) | 0.93     | 1.27 (0.76, 2.15) | 0.37     | 1.07 (0.61, 1.91) | 0.81     |
| Pregnancy     | 1     | 1.36 (0.83, 2.23) | 0.22     | 1.63 (0.76, 3.50) | 0.21     | 1.63 (0.72, 3.71) | 0.24     | 1.30 (0.57, 2.98) | 0.53     |
|               | 2     | 1.27 (0.77, 2.09) | 0.36     | 1.88 (0.90, 3.97) | 0.10     | 2.22 (1.04, 4.75) | 0.04     | 1.30 (0.63, 2.71) | 0.48     |
|               | 3     | 1.17 (0.70, 1.97) | 0.54     | 1.01 (0.59, 1.72) | 0.98     | 1.07 (0.61, 1.85) | 0.82     | 0.76 (0.44, 1.29) | 0.30     |
|               | 4     | 1.16 (0.71, 1.90) | 0.55     | 1.37 (0.83, 2.27) | 0.21     | 1.11 (0.66, 1.87) | 0.69     | 0.86 (0.52, 1.41) | 0.55     |
|               | 5     | 1.18 (0.72, 1.93) | 0.51     | 1.47 (0.89, 2.41) | 0.13     | 1.08 (0.65, 1.79) | 0.78     | 0.73 (0.44, 1.23) | 0.24     |
|               | 6     | 0.98 (0.59, 1.62) | 0.94     | 1.09 (0.66, 1.80) | 0.75     | 0.81 (0.48, 1.36) | 0.43     | 0.65 (0.39, 1.09) | 0.10     |
|               | 7     | 0.95 (0.58, 1.56) | 0.84     | 1.09 (0.65, 1.81) | 0.75     | 0.78 (0.47, 1.31) | 0.35     | 0.69 (0.41, 1.17) | 0.17     |
|               | 8     | 0.90 (0.55, 1.49) | 0.69     | 1.12 (0.68, 1.86) | 0.65     | 0.73 (0.44, 1.23) | 0.23     | 0.68 (0.40, 1.15) | 0.15     |
|               | 9     | 1.32 (0.78, 2.23) | 0.30     | 1.19 (0.70, 2.04) | 0.52     | 0.88 (0.50, 1.54) | 0.65     | 0.67 (0.38, 1.17) | 0.16     |
| Breastfeeding | BF    | 0.83 (0.45, 1.52) | 0.54     | 0.80 (0.43, 1.48) | 0.47     | 0.53 (0.28, 1.03) | 0.06     | 0.46 (0.24, 0.88) | 0.02     |

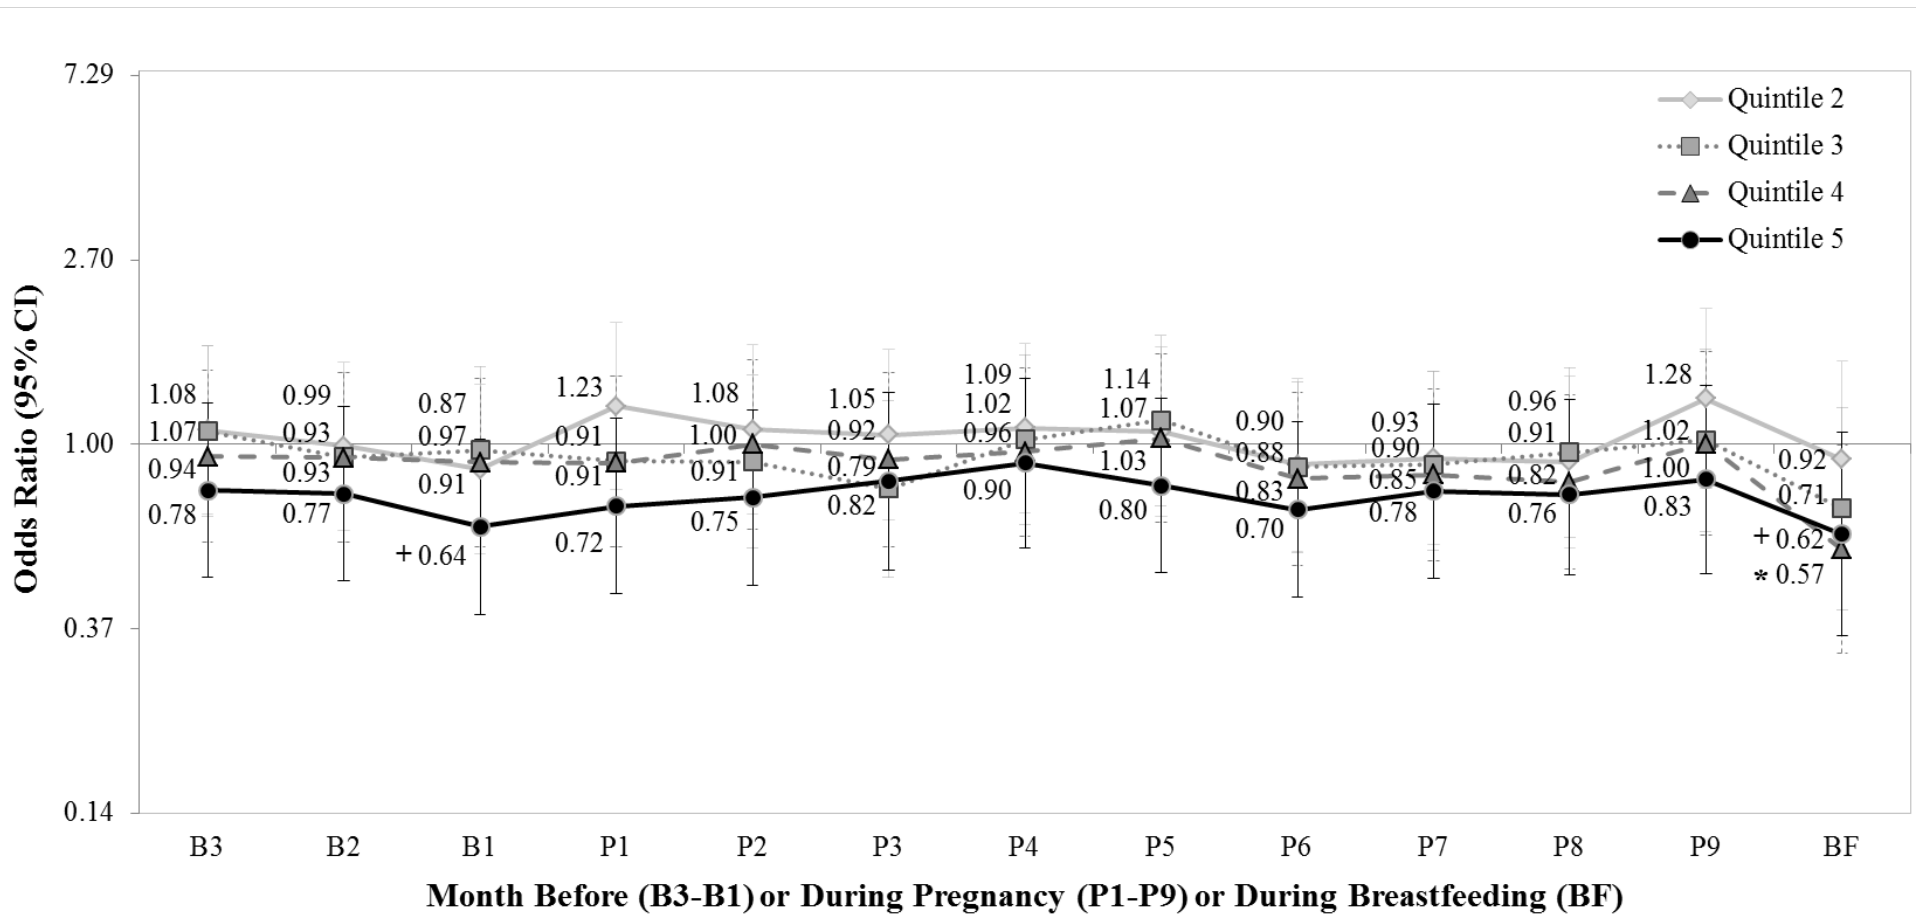

**Web Figure 2.** Unadjusted odds ratios (95% CI) for associations between mean iron intake during the index period and autism spectrum disorder in the CHARGE Study, California, United States, 2003–2009. Significant associations with ASD are signified by an asterisk (\*) at  $P < 0.05$  and by a plus sign (+) at  $P < 0.10$ .

**Web Table 4.** Adjusted Odds Ratios (OR) and 95% Confidence Intervals (CI) for Associations Between Taking an Iron-Specific Supplement and Quintiles of Mean Maternal Iron Intake During Breastfeeding for those who Breastfed and Child's Risk of ASD in the CHARGE Study, California, United States, 2003–2009

|                                        |             | TD  | ASD | OR <sup>a</sup> | 95 % CI    | <i>P</i> Value | OR <sup>b</sup> | 95 % CI    | <i>P</i> Value |
|----------------------------------------|-------------|-----|-----|-----------------|------------|----------------|-----------------|------------|----------------|
| Took iron-specific supplement          | No          | 147 | 239 | Reference       |            |                | Reference       |            |                |
|                                        | Yes         | 28  | 24  | 0.51            | 0.28, 0.93 | <b>0.03</b>    | 0.41            | 0.21, 0.83 | <b>0.01</b>    |
| Quintiles of mean iron intake (mg/day) | <21         | 35  | 69  | Reference       |            |                | Reference       |            |                |
|                                        | 21–< 30.7   | 33  | 62  | 0.83            | 0.45, 1.52 | 0.54           | 0.75            | 0.28, 1.98 | 0.56           |
|                                        | 30.7–< 36.5 | 31  | 50  | 0.80            | 0.43, 1.48 | 0.47           | 0.73            | 0.26, 2.06 | 0.55           |
|                                        | 36.5–< 62.1 | 36  | 40  | 0.53            | 0.28, 1.03 | 0.06           | 0.45            | 0.16, 1.28 | 0.13           |
|                                        | ≥62.1       | 38  | 41  | 0.46            | 0.24, 0.88 | <b>0.02</b>    | 0.32            | 0.11, 0.93 | <b>0.04</b>    |
| 2-sided <i>P</i> for trend             |             |     |     |                 |            | <b>0.01</b>    | <b>0.003</b>    |            |                |

<sup>a</sup> Adjusted for folic acid intake during the first month (<600 μg/day, ≥600 μg/day), child's birth year, and home ownership.

<sup>b</sup> Adjusted for folic acid intake during breastfeeding (<800 μg/day, ≥800 μg/day), child's birth year, and home ownership.

**Web Table 5.** Mean Maternal Iron Intake and Odds Ratios (OR) and 95% Confidence Intervals (95% CI) for Autism Spectrum Disorder (ASD) With or Without ASD-Related Characteristics in the CHARGE Study, California, United States, 2003–2009

| ASD-Related Characteristic                     | ASD<br>With Condition |      |      |                       |                 |              |              | ASD<br>Without Condition |      |      |                       |                 |              |              |                       |
|------------------------------------------------|-----------------------|------|------|-----------------------|-----------------|--------------|--------------|--------------------------|------|------|-----------------------|-----------------|--------------|--------------|-----------------------|
|                                                | <i>n</i>              | Mean | SD   | <i>P</i> <sup>1</sup> | OR <sup>2</sup> | (95% CI)     | <i>P</i>     | <i>n</i>                 | Mean | SD   | <i>P</i> <sup>1</sup> | OR <sup>2</sup> | (95% CI)     | <i>P</i>     | <i>P</i> <sup>3</sup> |
| Regression <sup>4</sup>                        | 212                   | 53.4 | 34.6 | 0.20                  | 0.60            | (0.32, 1.13) | 0.11         | 242                      | 50.2 | 33.5 | <b>0.02</b>           | 0.39            | (0.21, 0.74) | <b>0.004</b> | 0.29                  |
| Delayed or atypical development <sup>5,6</sup> | 383                   | 50.3 | 33.0 | <b>0.01</b>           | 0.49            | (0.26, 0.79) | <b>0.005</b> | 63                       | 57.7 | 37.7 | 0.89                  | 0.73            | (0.39, 1.85) | 0.51         | 0.23                  |
| Experienced seizures <sup>7</sup>              | 28                    | 49.4 | 35.4 | 0.24                  | 0.36            | (0.10, 1.29) | 0.12         | 384                      | 50.9 | 33.8 | <b>0.01</b>           | 0.49            | (0.28, 0.84) | <b>0.01</b>  | 0.78                  |
| Verbal status <sup>8</sup>                     | 303                   | 52.2 | 34.8 | 0.06                  | 0.46            | (0.25, 0.82) | <b>0.009</b> | 150                      | 50.9 | 32.5 | 0.07                  | 0.50            | (0.25, 1.03) | 0.06         | 0.77                  |

<sup>1</sup> Two-sided *P* values derived from Wilcoxon 2-sample test comparing iron intake between this ASD diagnostic subgroup and the TD group; mean iron intake = 57.1 (SD, 36.6), *n* = 307.

<sup>2</sup> Highest quintile of iron intake ( $\geq 86$  mg/day) compared with the lowest quintile of iron intake ( $< 30$  mg/day), ASD versus TD, adjusted for maternal folic acid intake during the first month of pregnancy, child's year of birth, and home ownership.

<sup>3</sup> Two-sided *P* values derived from Wilcoxon 2-sample test comparing iron between the ASD diagnostic subgroups (with and without the condition).

<sup>4</sup> Regression was defined as present if the child experienced loss of language skills after acquisition and/or social engagement/responsiveness, derived from questions on the Autism Diagnostic Interview–Revised (1) and the Early Development Questionnaire (2). More specifically, the child was considered to have regressed if question 11 [language loss] or 25 [possible or definite social engagement/responsiveness loss] was coded as 1 for “yes” or 3 or more communication or social skills losses were reported on questions A3-4, B1-5 [gestures and imitative behaviors, understanding spoken language, interest in family or peers, responsive smiling, reaching for caregiver, direct eye contact during communication, interest in interactive games] in Part 3 of the Early Development Questionnaire.

<sup>5</sup> Atypical development/mild delays was defined as having either Mullen Scales of Early Learning (MSEL)  $< 70$  or Vineland Adaptive Behavior Scales (VABS)  $< 70$ , but not both  $< 70$ , and the assessment with a score above the cutpoint is more than 0.5 SD above the cutpoint (a score of 78 points or more) for children recruited as DD or TD (but not meeting criteria for either) and scoring 14 or lower on the Social Communication Questionnaire.

<sup>6</sup> Delayed development was defined as MSEL composite of less than 70 and VABS composite of less than 70, or below 70 on one assessment and within 0.5 standard deviation of 70 ( $\pm 7$  points) on the other assessment.

<sup>7</sup> Seizures reported by parents on a physician-administered child medical history.

<sup>8</sup> Verbal/nonverbal status was defined as in Gotham et al. (3): a child was considered verbal if he/she received a code of 0, 1 or 2 on item A1 of the Autism Diagnostic Observation Schedule–Generic (ADOS) module 1 (for children using single words), or used ADOS Module 2 or 3 (for children speaking in phrases or speaking fluently); a child was considered nonverbal if he/she received a code of 3 or 8 on item A1 of the ADOS module 1.

**Web Table 6.** Odds Ratios (OR) and 95% Confidence Intervals (CI) for Associations Between Maternal Iron Intake During the Index Period and Child’s Risk of ASD Stratified by Child’s Age at the Time of Interview as a Proxy for the Length of Maternal Recall

|                                        | Child Aged <3.6 Years <sup>a</sup> |     |                 |            |             | Child Aged ≥3.6 Years |     |                 |            |          |
|----------------------------------------|------------------------------------|-----|-----------------|------------|-------------|-----------------------|-----|-----------------|------------|----------|
|                                        | TD                                 | ASD | OR <sup>b</sup> | 95 % CI    | <i>P</i>    | TD                    | ASD | OR <sup>b</sup> | 95 % CI    | <i>P</i> |
| Iron-specific vitamin                  |                                    |     |                 |            |             |                       |     |                 |            |          |
| No                                     | 118                                | 164 |                 | Reference  |             | 116                   | 216 |                 | Reference  |          |
| Yes                                    | 52                                 | 50  | 0.52            | 0.30, 0.90 | <b>0.02</b> | 55                    | 80  | 0.74            | 0.45, 1.20 | 0.22     |
| Quintiles of mean iron intake (mg/day) |                                    |     |                 |            |             |                       |     |                 |            |          |
| <30                                    | 28                                 | 45  |                 | Reference  |             | 32                    | 71  |                 | Reference  |          |
| 30–<36                                 | 33                                 | 47  | 1.00            | 0.48, 2.07 | 0.997       | 28                    | 45  | 0.89            | 0.45, 1.76 | 0.74     |
| 36–<52                                 | 31                                 | 42  | 1.12            | 0.52, 2.41 | 0.78        | 32                    | 46  | 0.60            | 0.30, 1.19 | 0.14     |
| 52–<86                                 | 21                                 | 28  | 1.05            | 0.46, 2.39 | 0.90        | 39                    | 64  | 0.63            | 0.33, 1.20 | 0.16     |
| ≥86                                    | 41                                 | 27  | 0.38            | 0.18, 0.83 | <b>0.01</b> | 22                    | 39  | 0.65            | 0.31, 1.37 | 0.26     |
| 2-sided <i>P</i> for trend             |                                    |     |                 |            | <b>0.03</b> | 0.11                  |     |                 |            |          |

<sup>a</sup> 3.6 years was the median age at the start of the study interview for children with typical development.

<sup>b</sup> Adjusted for folic acid, child’s birth year, and home ownership.



**Web Table 7.** Frequency of Cases and Controls with Information on Maternal Quantitative Iron Intake During the Index Period and Confounders by Child's Year of Birth

|            | 1998 |    | 1999 |    | 2000 |    | 2001 |    | 2002 |    | 2003 |    | 2004 |    | 2005 |    | 2006 |    | 2007 |    | 2008 |    |
|------------|------|----|------|----|------|----|------|----|------|----|------|----|------|----|------|----|------|----|------|----|------|----|
|            | ASD  | TD |
| Quintile 1 | 0    | 0  | 9    | 0  | 19   | 4  | 18   | 6  | 17   | 9  | 12   | 7  | 10   | 11 | 13   | 6  | 5    | 5  | 2    | 5  | 0    | 1  |
| Quintile 2 | 1    | 0  | 4    | 0  | 10   | 0  | 23   | 6  | 17   | 5  | 6    | 15 | 10   | 8  | 8    | 10 | 5    | 6  | 2    | 3  | 0    | 0  |
| Quintile 3 | 2    | 0  | 4    | 1  | 5    | 3  | 11   | 5  | 14   | 9  | 9    | 12 | 9    | 13 | 13   | 5  | 9    | 5  | 2    | 3  | 0    | 1  |
| Quintile 4 | 2    | 0  | 6    | 1  | 17   | 5  | 16   | 8  | 10   | 15 | 10   | 10 | 11   | 3  | 11   | 4  | 3    | 5  | 0    | 2  | 0    | 0  |
| Quintile 5 | 1    | 0  | 5    | 0  | 14   | 5  | 8    | 7  | 8    | 10 | 5    | 14 | 8    | 9  | 5    | 2  | 1    | 2  | 2    | 6  | 0    | 0  |

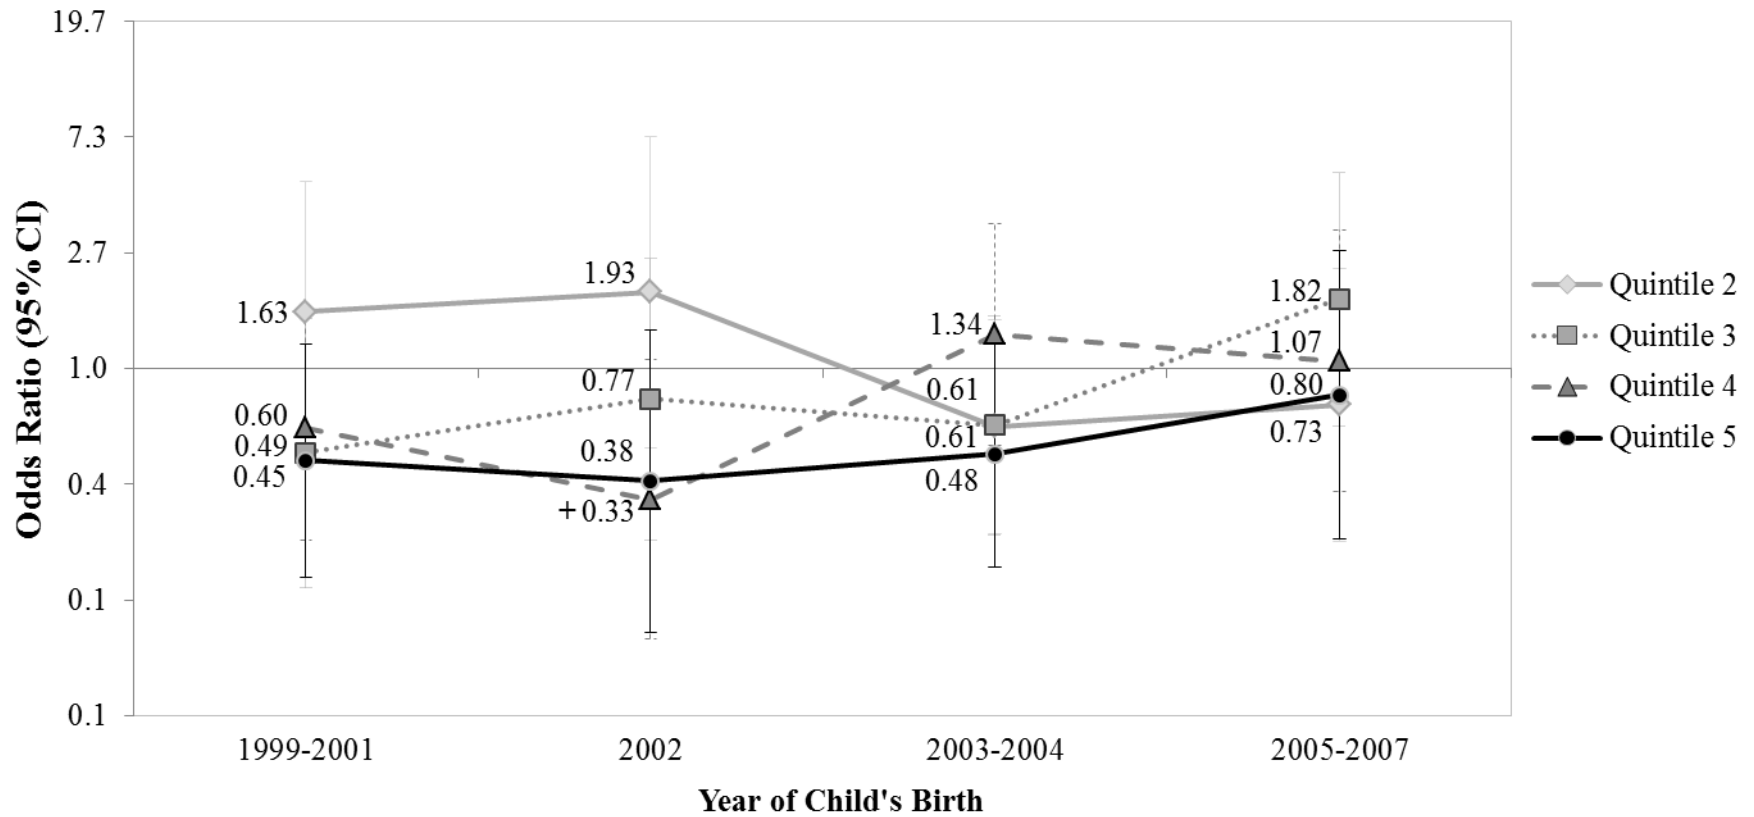

**Web Figure 3.** Adjusted odds ratios (95% CI) for the association between the highest quintile compared to the lowest quintile of maternal mean iron intake during the index period and autism spectrum disorder stratified by the child's year of birth in the CHARGE Study, California, United States, 2003–2009. Years having cells containing less than 5 individuals were combined. Odds ratios were adjusted for maternal folic acid intake during the first month of pregnancy, child's year of birth, and home ownership. *P* values for multiplicative interaction between child's birth year and the highest quintile of iron intake are: 0.89, 0.93, and 0.62 for years 1999–2001, 2003, 2003–2004, and 2005–2007, respectively (2002 was the reference year). Significant associations with ASD are signified by an asterisk (\*) at *P* < 0.05 and by a plus sign (+) at *P* < 0.10.

## References

1. Le Couteur A, Lord C, Rutter M. *Autism Diagnostic Interview–Revised (ADI-R)*. Los Angeles, CA: Western Psychological Services; 2003.
2. Ozonoff S, Williams BJ, Landa R. Parental report of the early development of children with regressive autism: the delays-plus-regression phenotype. *Autism*. Dec 2005;9(5):461–486.
3. Gotham K, Pickles A, Lord C. Standardizing ADOS scores for a measure of severity in autism spectrum disorders. *J Autism Dev Disord*. 2009;39(5):693–705.
